# Supplementary material for: Impacts of biogenic and anthropogenic emissions on summertime ozone formation in the Guanzhong Basin, China
Source: Copernicus journal article supplement (doi:10.5194/acp-18-7489-2018), 2018-05-30
Supplement: Supplementary file 1 [file acp-18-7489-2018-supplement.pdf]

Supplement of Atmos. Chem. Phys., 18, 7489–7507, 2018  
<https://doi.org/10.5194/acp-18-7489-2018-supplement>  
© Author(s) 2018. This work is distributed under  
the Creative Commons Attribution 4.0 License.

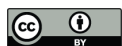

*Supplement of*

## **Impacts of biogenic and anthropogenic emissions on summertime ozone formation in the Guanzhong Basin, China**

**Nan Li et al.**

*Correspondence to:* Nan Li (linan@nuist.edu.cn)

The copyright of individual parts of the supplement might differ from the CC BY 4.0 License.

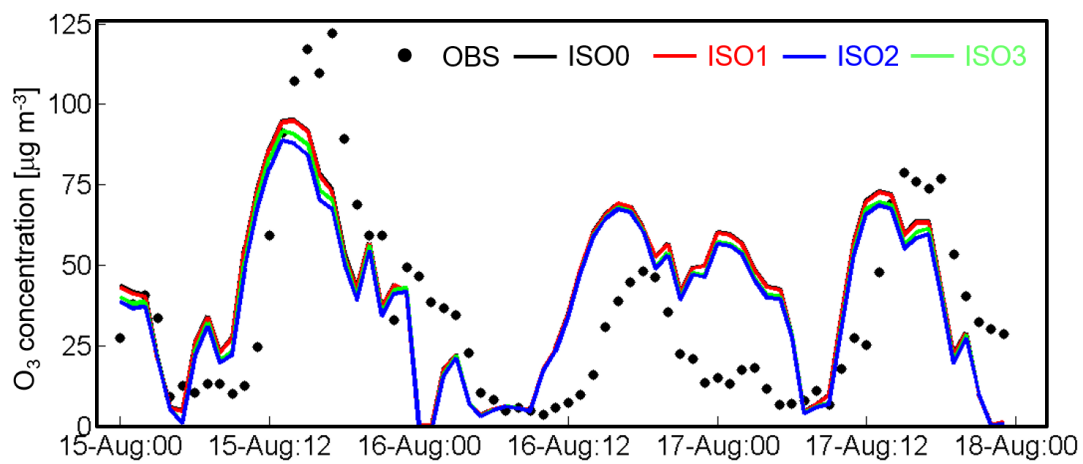

**Figure S1.** O<sub>3</sub> concentrations changes due to updated isoprene chemistry at Xi'an Jiaotong University for the period of 15<sup>th</sup> to 17<sup>th</sup> August 2011.

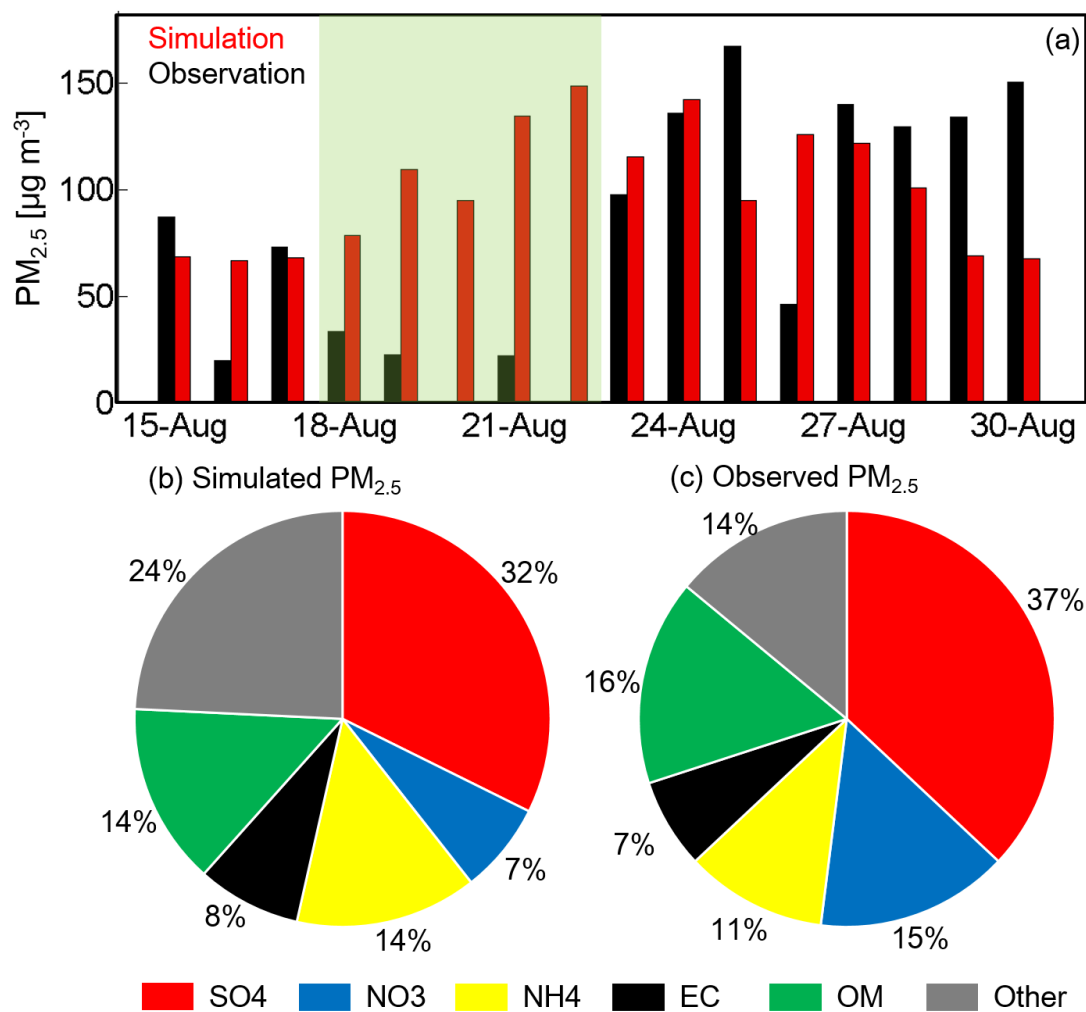

**Figure S2.** Observed and simulated PM<sub>2.5</sub> concentrations (a) and compositions (b and c) at Xi'an Jiaotong University in August 2011. The components are calculated during the periods excluding the rainy days (the green shadow).

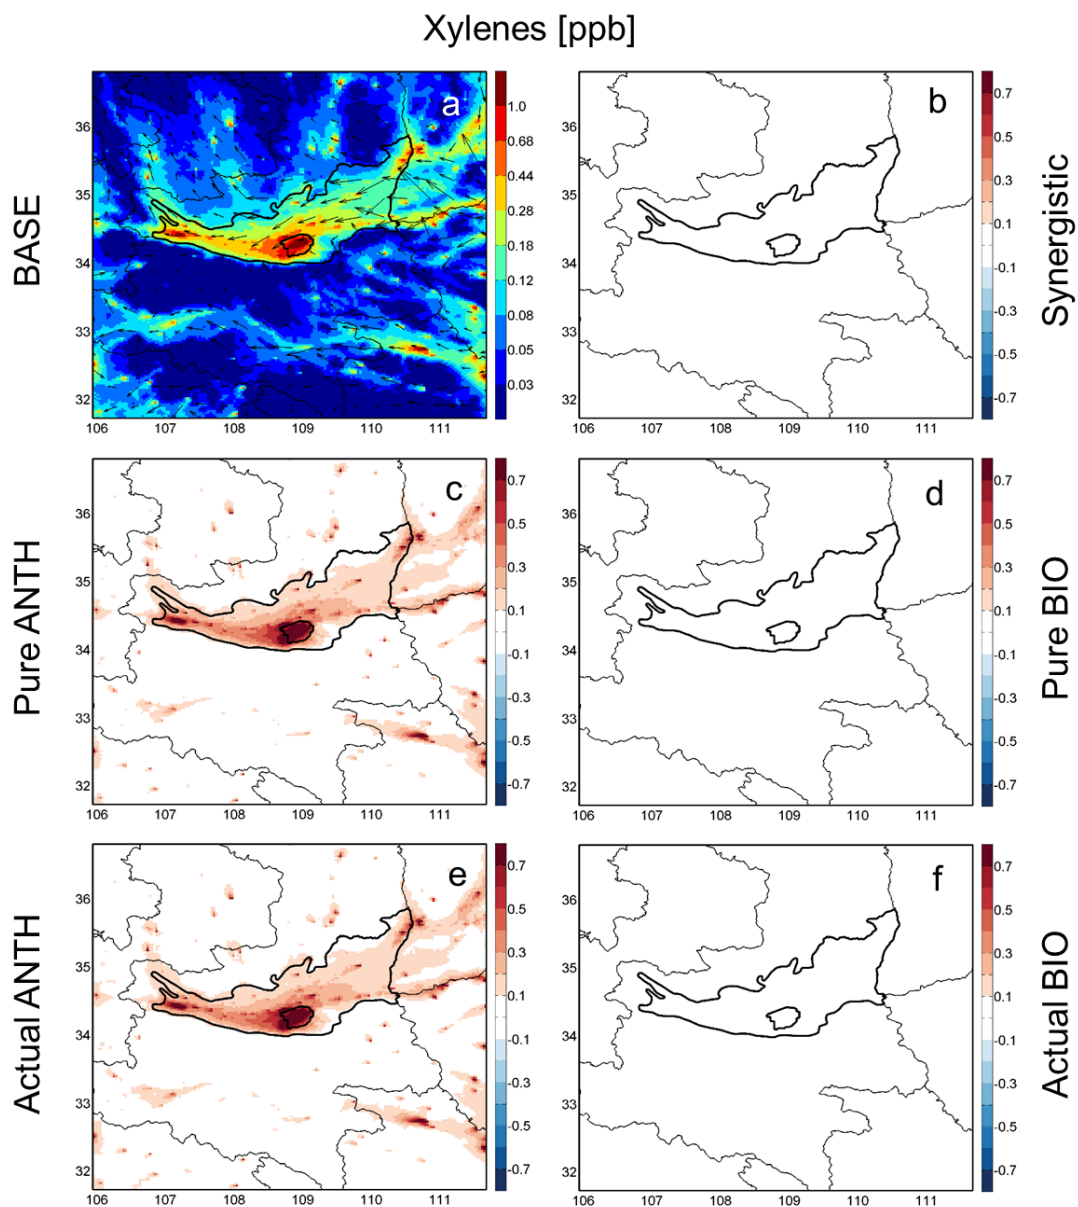

**Figure S3.** Spatial distributions of monthly mean concentrations of xylenes in August 2011. (a) is the result from the BASE simulation, overlaid with simulated wind vectors. (b)-(f) are simulated xylenes concentrations contributed from synergistic anthropogenic and biogenic, pure anthropogenic, pure biogenic, actual anthropogenic and actual biogenic sources, respectively.

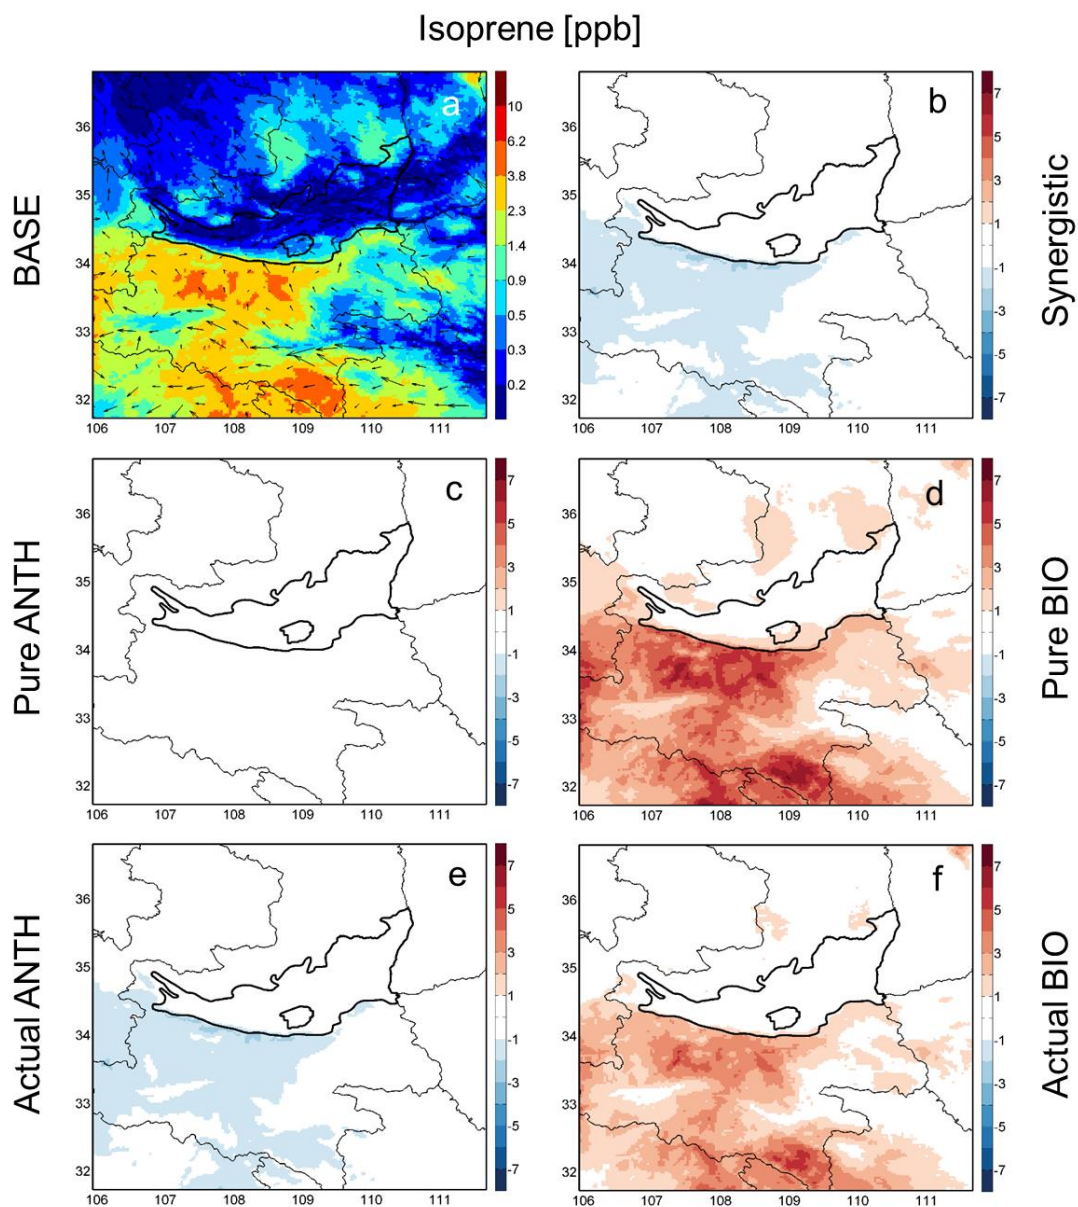

**Figure S4.** Spatial distributions of monthly mean concentrations of isoprene in August 2011. (a) is the result from the BASE simulation, overlaid with simulated wind vectors. (b)-(f) are simulated isoprene concentrations contributed from synergistic anthropogenic and biogenic, pure anthropogenic, pure biogenic, actual anthropogenic and actual biogenic sources, respectively.

### Monoterpenes [ppb]

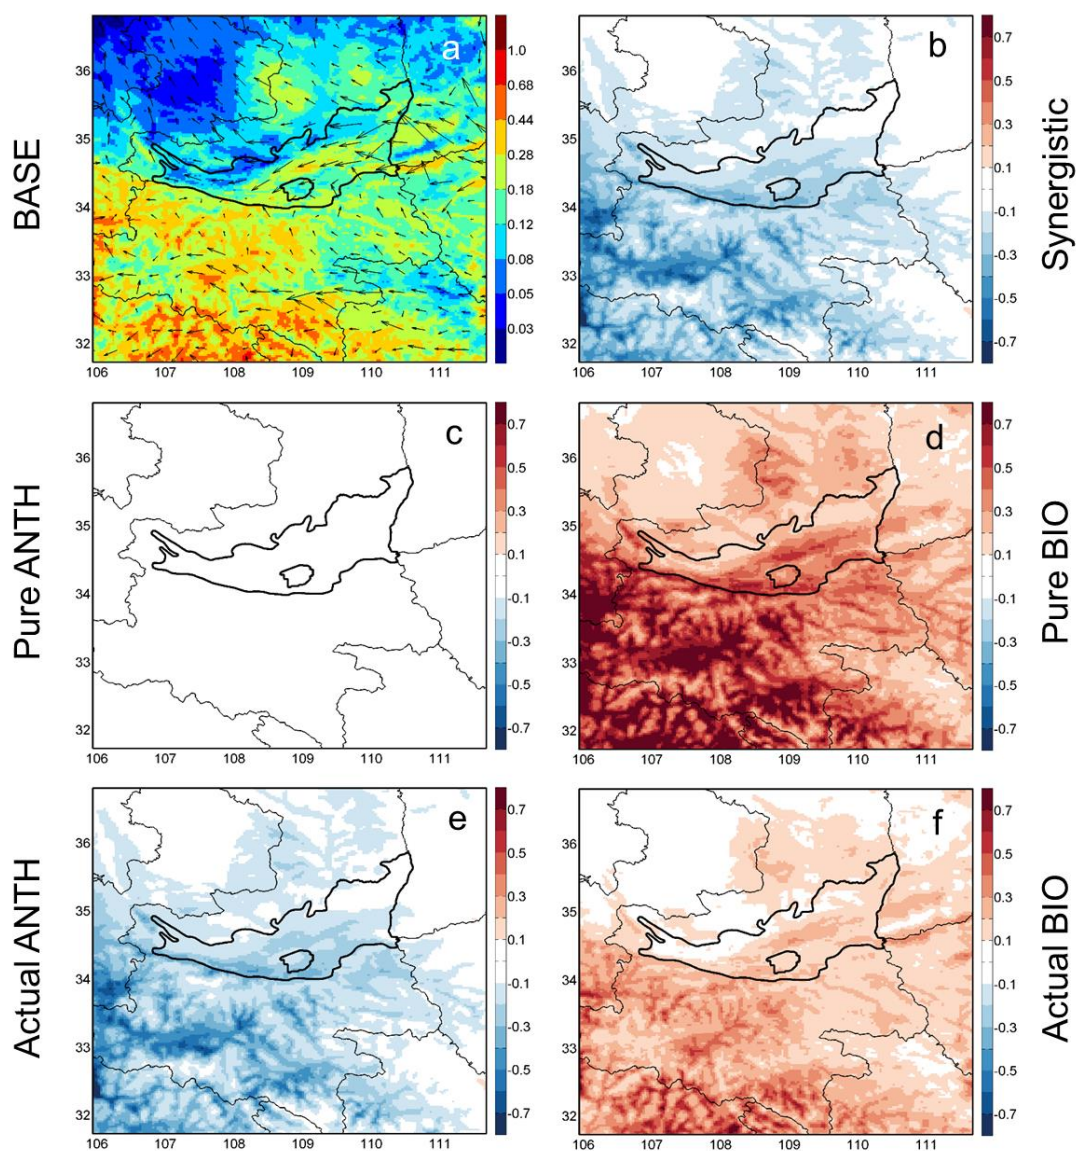

**Figure S5.** Spatial distributions of monthly mean concentrations of monoterpenes in August 2011. (a) is the result from the BASE simulation, overlaid with simulated wind vectors. (b)-(f) are simulated monoterpenes concentrations contributed from synergistic anthropogenic and biogenic, pure anthropogenic, pure biogenic, actual anthropogenic and actual biogenic sources, respectively.

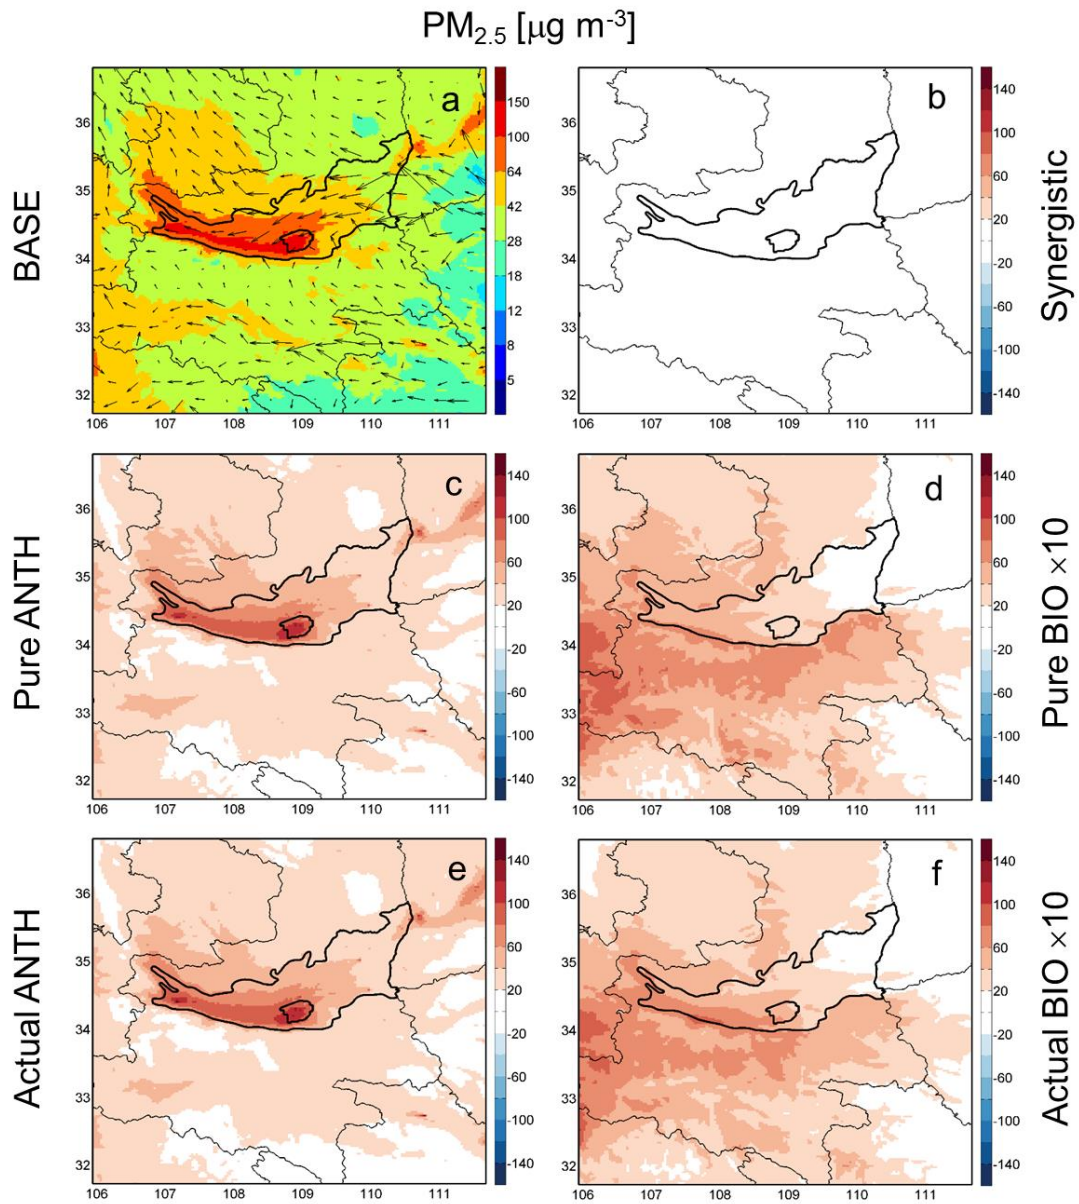

**Figure S6.** Spatial distributions of monthly mean concentrations of  $PM_{2.5}$  in August 2011. (a) is the result from the BASE simulation, overlaid with simulated wind vectors. (b)-(f) are simulated  $PM_{2.5}$  concentrations contributed from synergistic anthropogenic and biogenic, pure anthropogenic, pure biogenic, actual anthropogenic and actual biogenic sources, respectively.

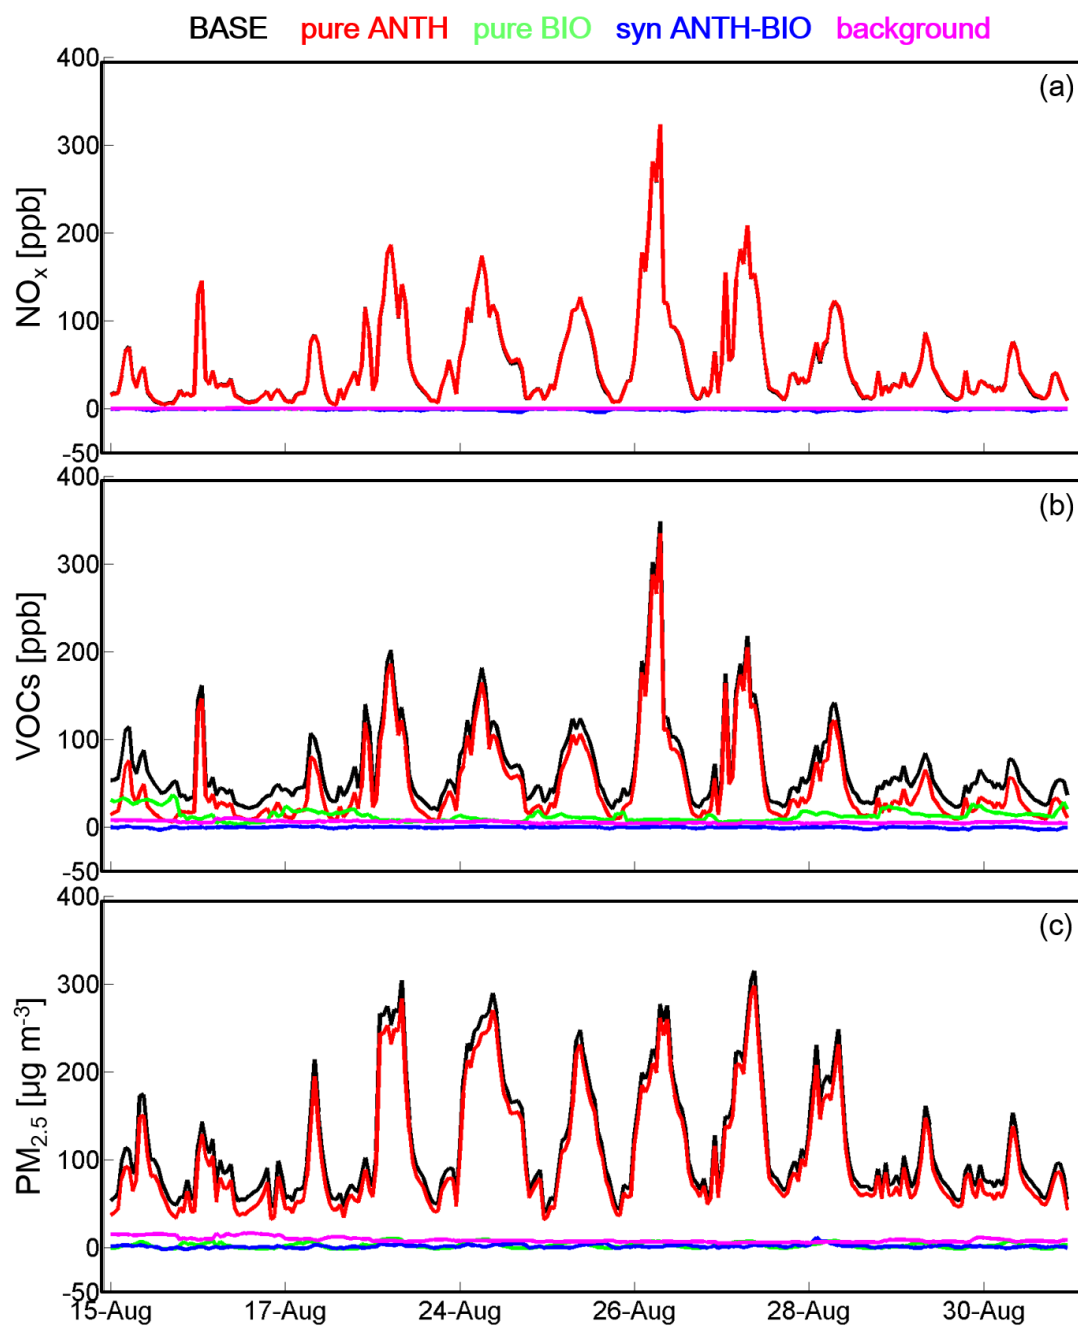

**Figure S7.** Temporal patterns of the simulated concentrations of  $\text{NO}_x$ , VOCs and  $\text{PM}_{2.5}$  and the various contribution components during the period from 15<sup>th</sup> to 30<sup>th</sup> August 2011, excluding the rainy days (18<sup>th</sup> -22<sup>nd</sup> August).



**Table S1.** Updated isoprene oxidation chemistry (unit for reaction rate is molecule<sup>-1</sup> cm<sup>3</sup> s<sup>-1</sup>)

| <b>Reactions</b>                                                |                                                    | <b>Reaction rates</b>                         |
|-----------------------------------------------------------------|----------------------------------------------------|-----------------------------------------------|
| ISOPO2+NO ><br>ALD+HCHO+HO2+0.96*NO2+0.04*ISOPN                 |                                                    | $2.7 \times 10^{-12}$<br>$\times \exp(350/T)$ |
| ISOPO2 ><br>2*HO2+HCHO+0.33*MGLY+0.5*GLYALD+0.25*GLYX+1.5*HACET |                                                    | $4.07 \times 10^8$<br>$\times \exp(-7694/T)$  |
| <b>Species name</b>                                             | <b>Description</b>                                 |                                               |
| T                                                               | Temperature (K)                                    |                                               |
| NO                                                              | Nitric oxide                                       |                                               |
| NO2                                                             | Nitrogen dioxide                                   |                                               |
| HO2                                                             | Hydroperoxy radical                                |                                               |
| ISOPO2                                                          | Hydroperoxy radicals from isoprene oxidation by OH |                                               |
| ISOPN                                                           | Organic nitrate                                    |                                               |
| HCHO                                                            | Formaldehyde                                       |                                               |
| ALD                                                             | Acetaldehyde and higher aldehydes                  |                                               |
| HACET                                                           | Hydroxyacetone                                     |                                               |
| MGLY                                                            | Methylglyoxal                                      |                                               |
| GLYALD                                                          | Glycolaldehyde                                     |                                               |
| GLYX                                                            | Glyoxal                                            |                                               |

**Table S2.** O<sub>3</sub> concentration changes due to updated isoprene chemistry averaged for urban Xi'an

| O <sub>3</sub> concentration (ppb) | ISO1 <sup>b</sup> -ISO0 <sup>a</sup> | ISO2 <sup>c</sup> -ISO0 | ISO3 <sup>d</sup> -ISO0 |
|------------------------------------|--------------------------------------|-------------------------|-------------------------|
| Daily peak                         | -0.47                                | -4.6                    | -2.9                    |
| 24h average                        | -0.27                                | -2.9                    | -2.0                    |

<sup>a</sup> ISO0: simulation using standard RADM2 mechanism

<sup>b</sup> ISO1: same as ISO0, but add isomerization of radicals from isoprene oxidation by OH

<sup>c</sup> ISO2: same as ISO0, but add formation of hydroxynitrates

<sup>d</sup> ISO3: same as ISO0, but with revisions in both ISO1 and ISO2.

**Table S3.** Domain-wide amount of emissions in August 2011

|                   | Anthropogenic (Gg mon <sup>-1</sup> ) | Biogenic (Gg mon <sup>-1</sup> ) | Total (Gg mon <sup>-1</sup> ) |
|-------------------|---------------------------------------|----------------------------------|-------------------------------|
| SO <sub>2</sub>   | 358 (±31%) <sup>a</sup>               | -                                | 358                           |
| NO <sub>x</sub>   | 110 (±37%) <sup>a</sup>               | 2.1                              | 112                           |
| NH <sub>3</sub>   | 69.0 (±153%) <sup>a</sup>             | -                                | 69.0                          |
| PM <sub>2.5</sub> | 163 (±133%) <sup>a</sup>              | -                                | 163                           |
| VOCs              | 72.2 (±78%) <sup>a</sup>              | 204                              | 276                           |
| Isoprene          | <0.1                                  | 157                              | 157                           |
| Monoterpenes      | -                                     | 22.8                             | 22.8                          |
| Alkanes           | 34.4                                  | 5.4                              | 39.8                          |
| Alkenes           | 21.3                                  | 4.9                              | 26.2                          |
| Aromatic          | 11.5                                  | -                                | 11.5                          |
| Carbonyls         | 4.5                                   | 12.1                             | 16.6                          |
| Organic acids     | 0.5                                   | 1.5                              | 2.0                           |

<sup>a</sup> Uncertainty in emission estimates (95 % confidence intervals).

**Table S4.** Simulated O<sub>3</sub> and VOC concentrations in urban Xi'an during 15<sup>th</sup>-17<sup>th</sup> August 2011.

| Species [ ppb ]      | VOC0 <sup>a</sup> | VOC1 <sup>b</sup> | VOC2 <sup>c</sup> |
|----------------------|-------------------|-------------------|-------------------|
| <b>O<sub>3</sub></b> | <b>40.7</b>       | <b>41.9</b>       | <b>39.8</b>       |
| Ethane               | 13.1              | 18.7              | 9.5               |
| C>2 alkanes          | 11.2              | 16.1              | 8.9               |
| HCHO                 | 7.4               | 5.5               | 5.0               |
| Acetaldehyde         | 5.4               | 4.7               | 4.2               |
| Toluene              | 2.9               | 4.3               | 2.2               |
| Ethene               | 2.8               | 4.2               | 2.3               |
| Organic nitrogen     | 2.7               | 1.7               | 1.5               |
| Organic peroxides    | 2.1               | 2.0               | 1.9               |
| C>2 alkenes          | 2.0               | 3.2               | 1.7               |
| Ketones              | 1.6               | 1.6               | 1.2               |
| Xylenes              | 1.2               | 1.9               | 0.8               |
| Organic acids        | 1.0               | 1.2               | 1.1               |
| <b>Total VOC</b>     | <b>53.3</b>       | <b>64.9</b>       | <b>40.3</b>       |

<sup>a</sup> VOC0: Base simulation using emission estimates from MEIC.

<sup>b</sup> VOC1: Same as Base, but with an increase of anthropogenic VOC emission by 50%

<sup>c</sup> VOC2: Same as Base, but with an decrease of anthropogenic VOC emission by 33%
